# Supplementary material for: Polydopamine nanosphere@silver nanoclusters for fluorescence detection of multiplex tumor markers
Source: Royal Society of Chemistry journal article supplement (doi:10.1039/c9nr01307e), 2019-01-01
Supplement: c9nr01307e1.pdf [file c9nr01307e1.pdf]

## Supporting Information

### **Polydopamine nanosphere@silver nanoclusters for fluorescent detection of multiplex tumor markers**

Yiting Jiang,<sup>abc</sup> Yuguang Tang,<sup>ab</sup> and Peng Miao<sup>\*acd</sup>

<sup>a</sup> Suzhou Institute of Biomedical Engineering and Technology, Chinese Academy of Sciences, Suzhou 215163, People's Republic of China

<sup>b</sup> Jihua Laboratory, Foshan 528200, People's Republic of China

<sup>c</sup> University of Science and Technology of China, Hefei 230026, People's Republic of China

<sup>d</sup> Jinan Guokekeyigong Science and Technology Development Co., Ltd., Jinan 250103, People's Republic of China

---

\* Corresponding author. Tel.: +86-512-69588279.

*E-mail address:* miaopeng@sibet.ac.cn (P. Miao).

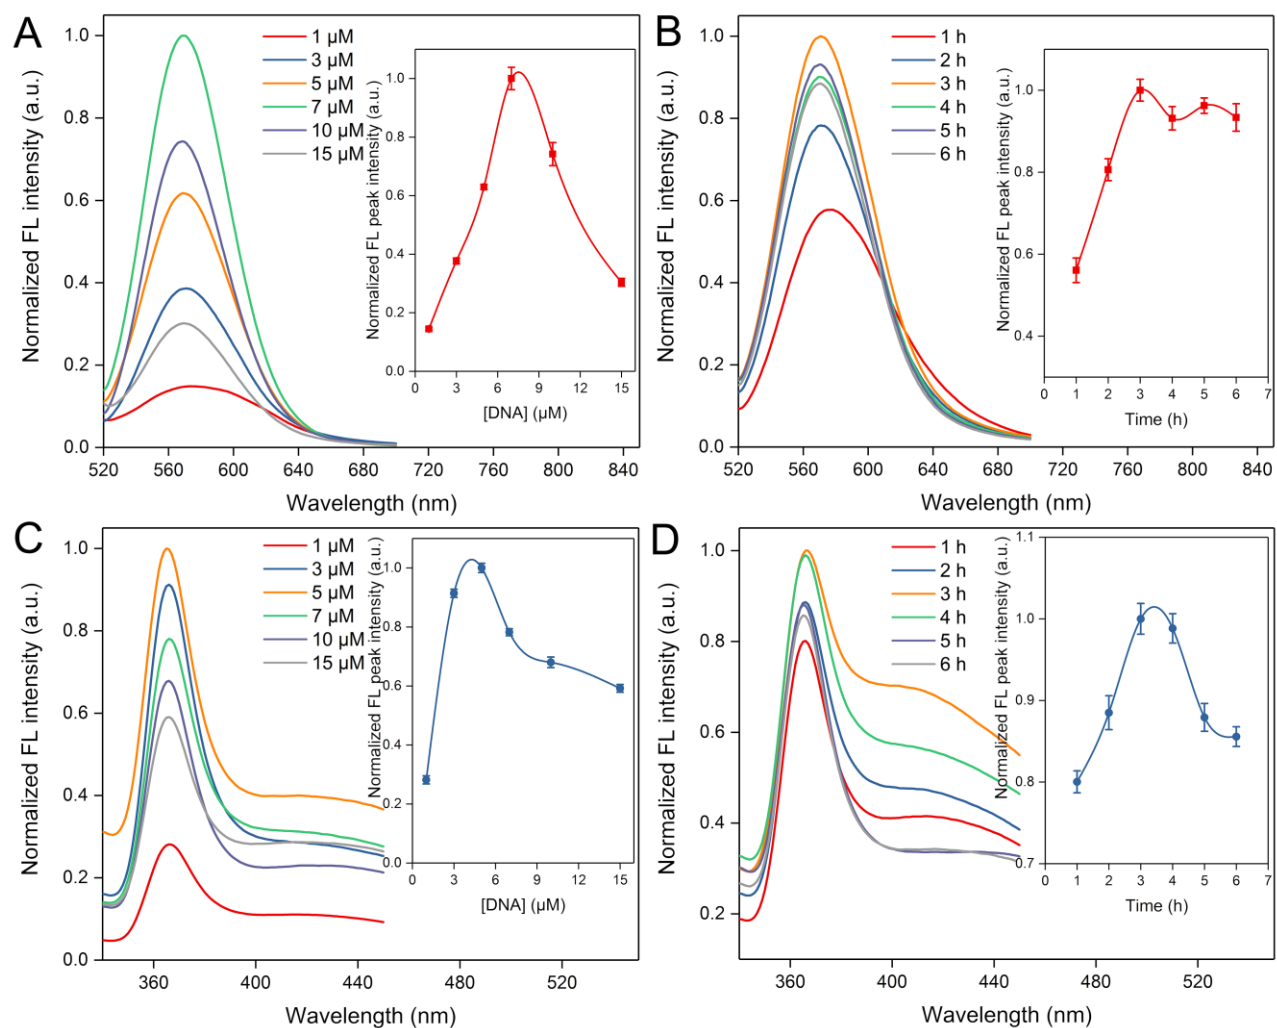

**Figure S1.** Optimization of AgNCs synthesis conditions: (A) Probe A concentration for A-AgNCs; (B) reaction time for A-AgNCs; (C) Probe C concentration for C-AgNCs; (D) reaction time for C-AgNCs.

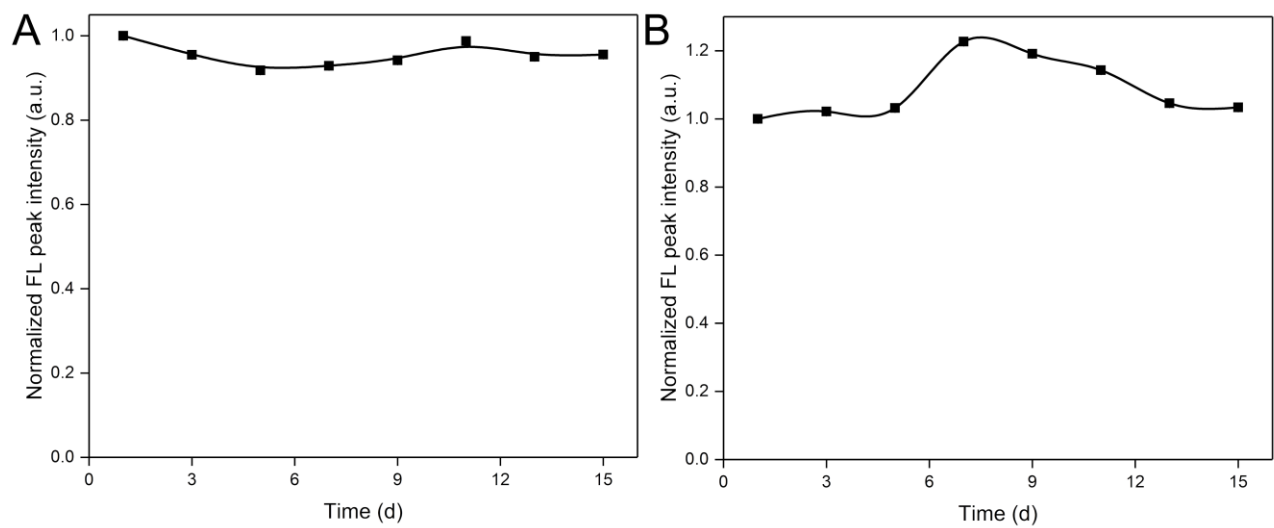

**Figure S2.** Normalized FL peak intensities for (A) A-AgNCs, (B) C-AgNCs for 15 days.

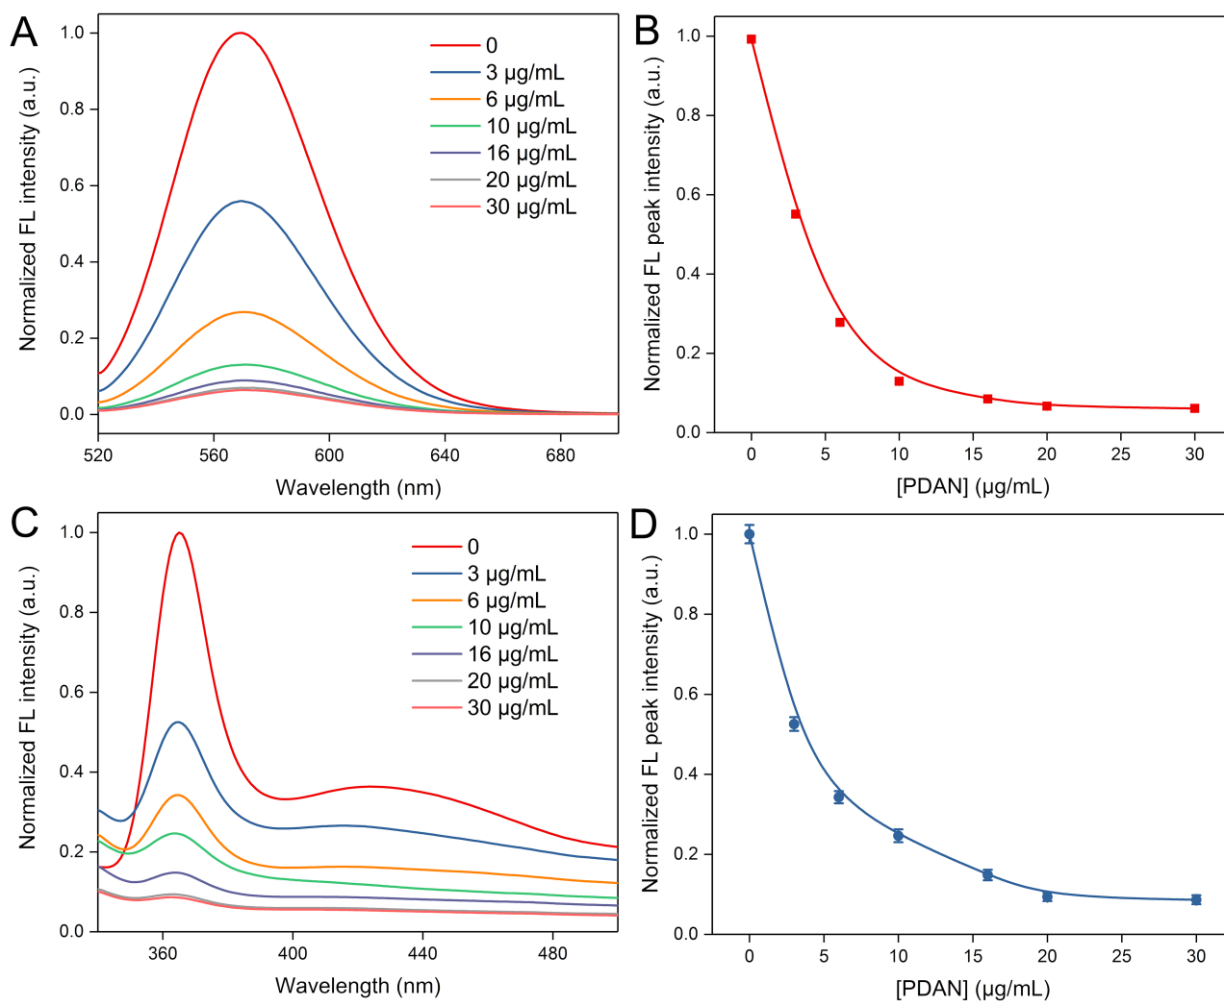

**Figure S3.** Fluorescence emission spectra of (A) A-AgNCs and (C) C-AgNCs quenched by different concentrations of PDAN. (B) and (D) are corresponding calibration curves showing the relationships between FL peak intensities and PDAN concentrations.

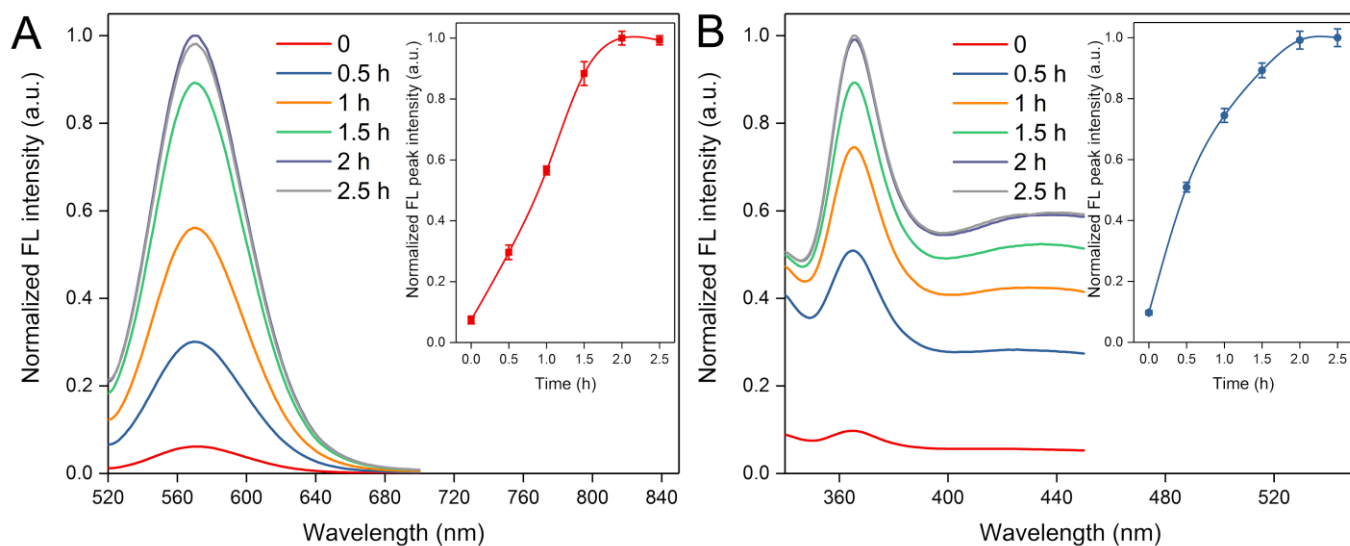

**Figure S4.** Fluorescence emission spectra of (A) PDAN@A-AgNCs and PDAN@C-AgNCs for the detection of AFP and CEA with different reaction times, respectively.

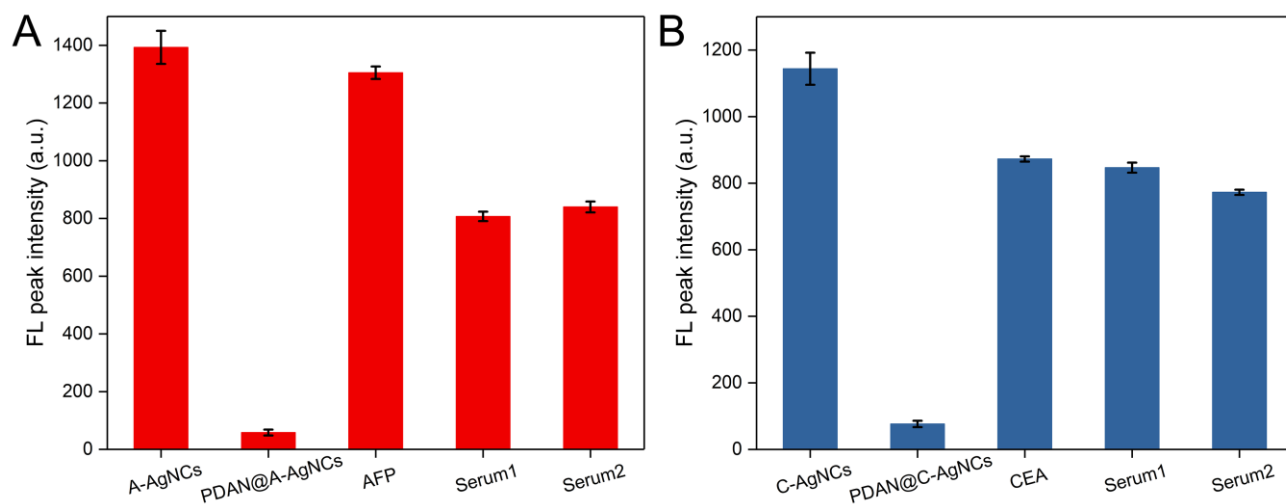

**Figure S5.** Fluorescence responses of AgNCs, PDAN@AgNCs before and after the detection of tumor markers spiked in different solutions.
